# Supplementary material for: SNX5 suppresses clear cell renal cell carcinoma progression by inducing CD44 internalization and epithelial-to-mesenchymal transition
Source: PubMed Central journal article supplement (PMC8717386; doi:10.1016/j.omto.2021.12.002), 2021-12-06
Supplement: mmc1.pdf [file mmc1.pdf]

OMTO, Volume 24

## **Supplemental information**

**SNX5 suppresses clear cell renal cell carcinoma progression by inducing CD44 internalization and epithelial-to-mesenchymal transition**

**Qingqing Zhou, Jiajun Li, Chao Ge, Jinsi Chen, Wei Tian, and Hua Tian**

## SUPPLEMENTARY MATERIAL

**Supplementary Table S1.** The sequences of shRNA Target

| Identifier | Forward (5'-3')       |
|------------|-----------------------|
| SNX5-1     | CCCTCATTGACTATGAGAACT |
| SNX5-2     | CCCGTAGTTCGTCTTTAGTTA |
| KLF9-1     | GCTTTGTATGAGTTGTACTTT |
| KLF9-3     | CTCCCATCTCAAAGCCCATTA |

**SupplementaryTable S2.**The sequences of gene-specific primers used for qRT-PCR vector constructs and ChIP assay

| <b>Gene name</b>                     | <b>Forward (5'-3')</b>    | <b>Reverse (5'-3')</b> |
|--------------------------------------|---------------------------|------------------------|
| <b>Primers for qRT-PCR</b>           |                           |                        |
| SNX5                                 | GCACACAAAGACCACACTGC      | TGCATCTTCTCTCGAGGACC   |
| CD44                                 | CCATCCCAGACGAAGACAGT      | GGTTGTGTTTGCTCCACCTT   |
| Oct4                                 | CTTGCTGCAGAAGTGGGTGGAGGAA | CTGCAGTGTGGGTTTCGGGCA  |
| KLF9                                 | GTGACCACCGAATCTGGGTC      | GGCCGTTACCTGTATGCA     |
| <b>Primers for vector constructs</b> |                           |                        |
| SNX5(-12<br>97/-30)                  | GCAAAGCATCTTCCTCCACC      | CTCAGCCCGAGTCCAAGATG   |
| <b>Primers for ChIP</b>              |                           |                        |
| ChIP-1                               | GCCACACAGTCCTAGGTGAC      | GCGGTCACAGTAATGGGAC    |
| ChIP-2                               | GAATGAACCCGTTGCACAGA      | AATCCAGACTCCTGCCACAG   |

**Supplementary Table S3.** Antibodies used in this study.

| Antibody                               | catalog                                | Dilution     | Company     |
|----------------------------------------|----------------------------------------|--------------|-------------|
| <b>For Western blotting</b>            |                                        |              |             |
| SNX5                                   | ab180520                               | 1:500        | Abcam       |
| MMP9                                   | Ab38898                                | 1:300        | Abcam       |
| E-cadherin                             | 3195T                                  | 1:300        | CST         |
| N-cadherin                             | 13116T                                 | 1:800        | CST         |
| Zo-1                                   | 8193T                                  | 1:500        | CST         |
| Claudin-1                              | 13255T                                 | 1:500        | CST         |
| Snail                                  | 3879T                                  | 1:500        | CST         |
| CD44                                   | Sc-7297                                | 1:300        | Santa Cruz  |
| Oct4                                   | CST-2750                               | 1:500        | CST         |
| MMP2                                   | 10373-2-ap                             | 1:300        | Proteintech |
| MMP7                                   | 10374-2-AP                             | 1:300        | Proteintech |
| KLF9                                   | A7196                                  | 1:300        | Abclonal    |
| $\beta$ -actin                         | A3854                                  | 1:20000      | Sigma       |
| Secondary antibody                     | HRP conjugated goat anti-rabbit IgG    | 1:4000       | Sigma       |
| Secondary antibody                     | HRP conjugated goat anti-mouse IgG     | 1:4000       | Sigma       |
| <b>For Immunohistochemistry</b>        |                                        |              |             |
| SNX5                                   | 17918-1-AP                             | 1:50         | Proteintech |
| Ki67                                   | Ab16667                                | 1:50         | Abcam       |
| PCNA                                   | Ab29                                   | 1:10000      | Abcam       |
| CD44                                   | Sc-7297                                | 1:50         | Santa Cruz  |
| Secondary antibody                     | Envision kit (HRP, rabbit/mouse, DAB+) | Ready-to-use | DAKO        |
| <b>For Immunofluorescence staining</b> |                                        |              |             |
| E-cadherin                             | 20874-1-AP                             | 1:50         | Proteintech |
| N-cadherin                             | Ab98952                                | 1:50         | Abcam       |
| CD44                                   | Sc-7297                                | 1:30         | Santa Cruz  |
| Secondary antibody                     | Alexa Fluor 488 anti-mouse IgG         | 1:50         | Invitrogen  |
| Secondary antibody                     | Alexa Fluor 594 anti-rabbit IgG        | 1:50         | Invitrogen  |
| <b>For flow cytometry analysis</b>     |                                        |              |             |
| E-cadherin                             | 324107                                 | Ready-to-use | Biologend   |
| CD44                                   | 338805                                 | Ready-to-use | Biologend   |

## Supplementary Figures

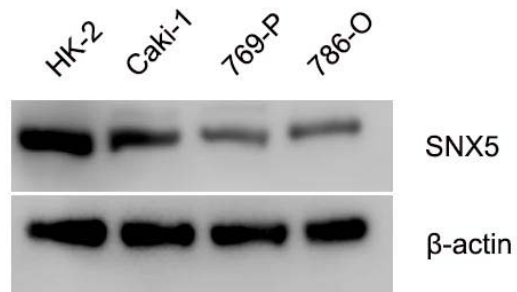

**Supplementary Figure S1.** The expression of SNX5 was detected by Western blotting in ccRCC cell lines and normal non-malignant renal cell line HK-2.

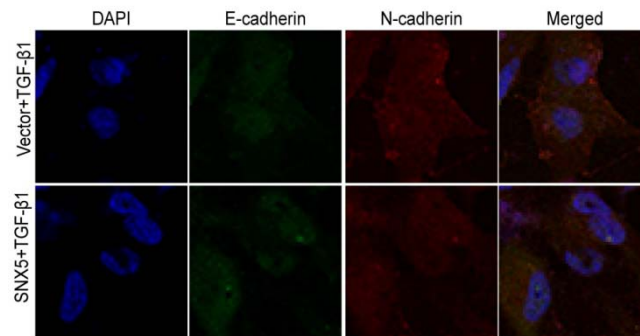

**Supplementary Figure S2.** SNX5-overexpressing 769-P cells with TGF- $\beta$  treated were applied to immunofluorescence staining. Antibodies against E-cadherin and N-cadherin were used.

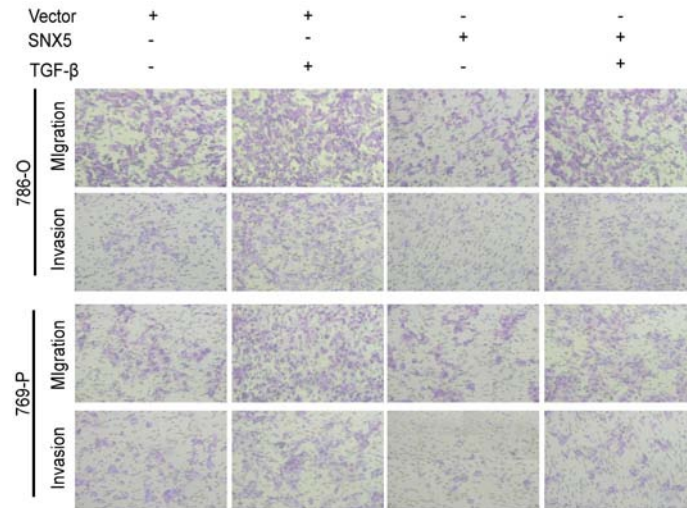

**Supplementary Figure S3.** SNX5-overexpressed ccRCC cells were treated with TGF- $\beta$  or control, and cell migration and invasion were evaluated by a transwell assay.

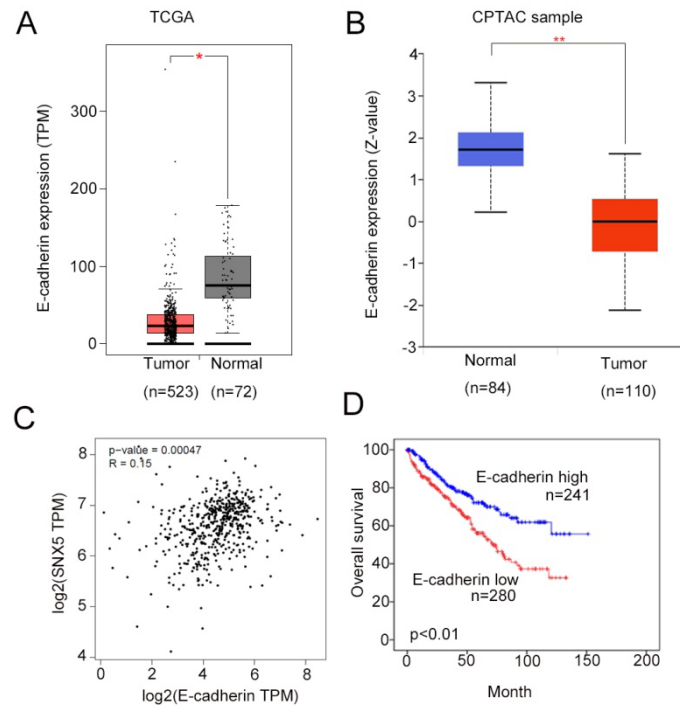

**Supplementary Figure S4. E-cadherin is downregulated and is associated with poor prognosis in ccRCC patients.** (A) The expression of E-cadherin in ccRCC tissues compared with adjacent normal tissues was analyzed using data sets from TCGA. (B) The expression of E-cadherin in ccRCC tissues compared with adjacent normal tissues was analyzed using data sets from CPTAC. (C) The correlation between SNX5 and E-cadherin in ccRCC tissues using TCGA. (D) Patients with low expression levels of E-cadherin had shorter overall survival than patients with high expression levels as determined using data sets from TCGA. \* $p < 0.05$ ; \*\* $p < 0.01$ .



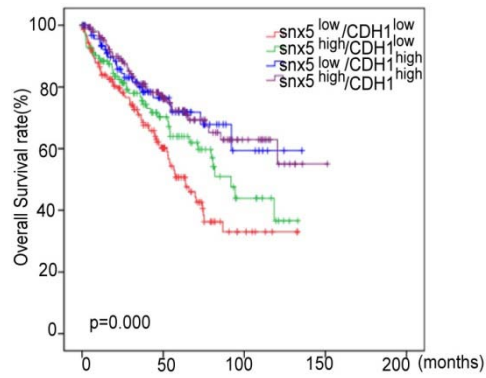

**Supplementary Figure S5.** Kaplan-Meier analysis of the correlation between the combined expression of SNX5 and E-cadherin with the overall survival of kidney cancer patients according to data sets from TCGA ( $P < 0.01$ , log-rank test).

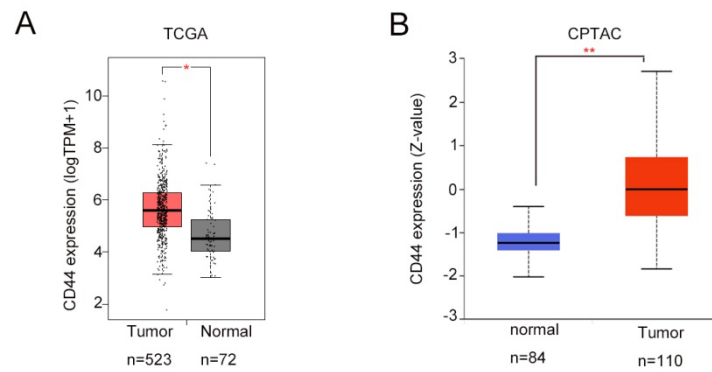

**Supplementary Figure S6.**(A)The expression of CD44 in ccRCC tissues compared with adjacent normal tissues was analyzed using data sets from TCGA. (B)The expression of CD44 in ccRCC tissues compared with adjacent normal tissues was analyzed using data sets from CPTAC.
